# Supplementary material for: Support-facet-dependent morphology of small Pt particles on ceria
Source: Royal Society of Chemistry journal article supplement (doi:10.1039/d3nr04701f), 2023-01-01
Supplement: d3nr04701f6.pdf [file d3nr04701f6.pdf]

# Supporting Information

## Support-Facet-Dependent Morphology of Small Pt Particles on Ceria

Henrik Eliasson, Yubiao Niu, Richard Palmer, Henrik Grönbeck and Rolf Erni\*

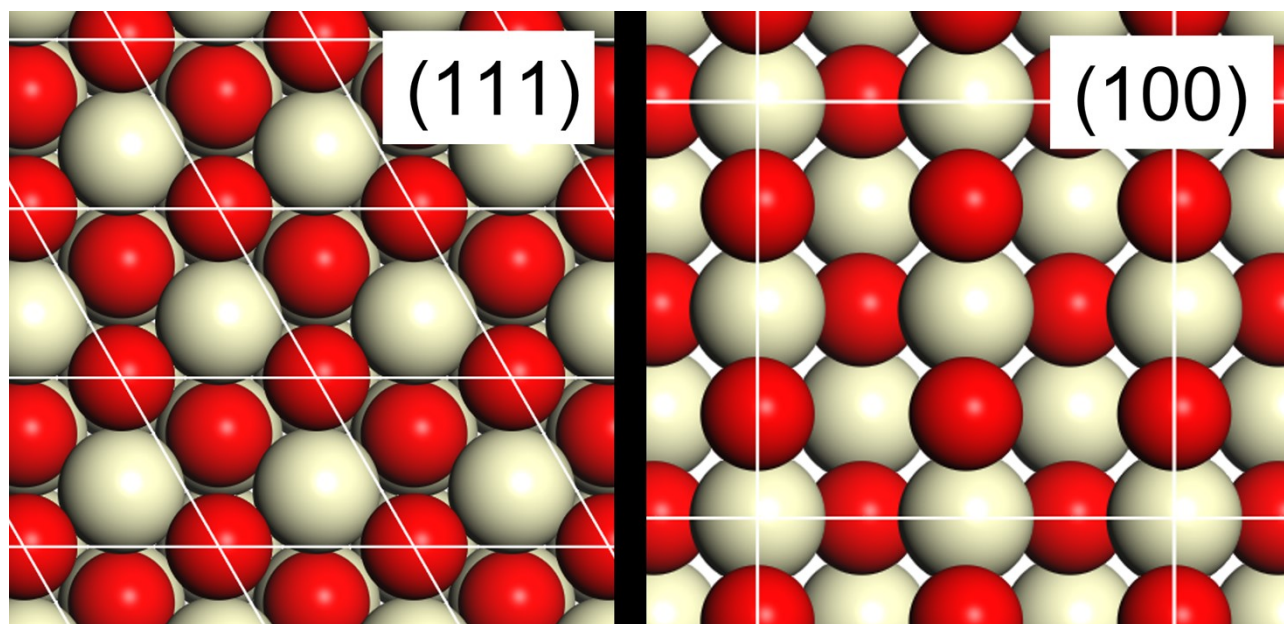

**Figure S1:** The surface termination chosen for the two CeO<sub>2</sub> facets.

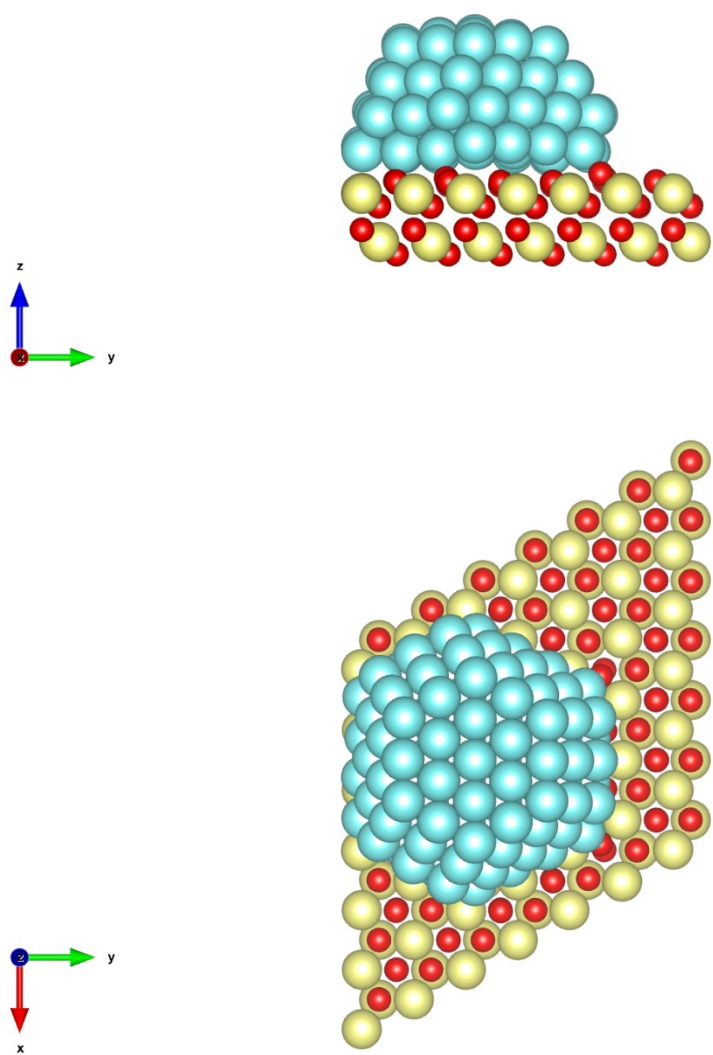

**Figure S2:** Symmetric Pt<sub>119</sub> structure with a stability of 0.64 eV/atom, slightly higher than for the asymmetric 118-atom particles in Fig. 2 of the main text. Color code: Cyan – Pt, Eggshell – Ce, Red – O.

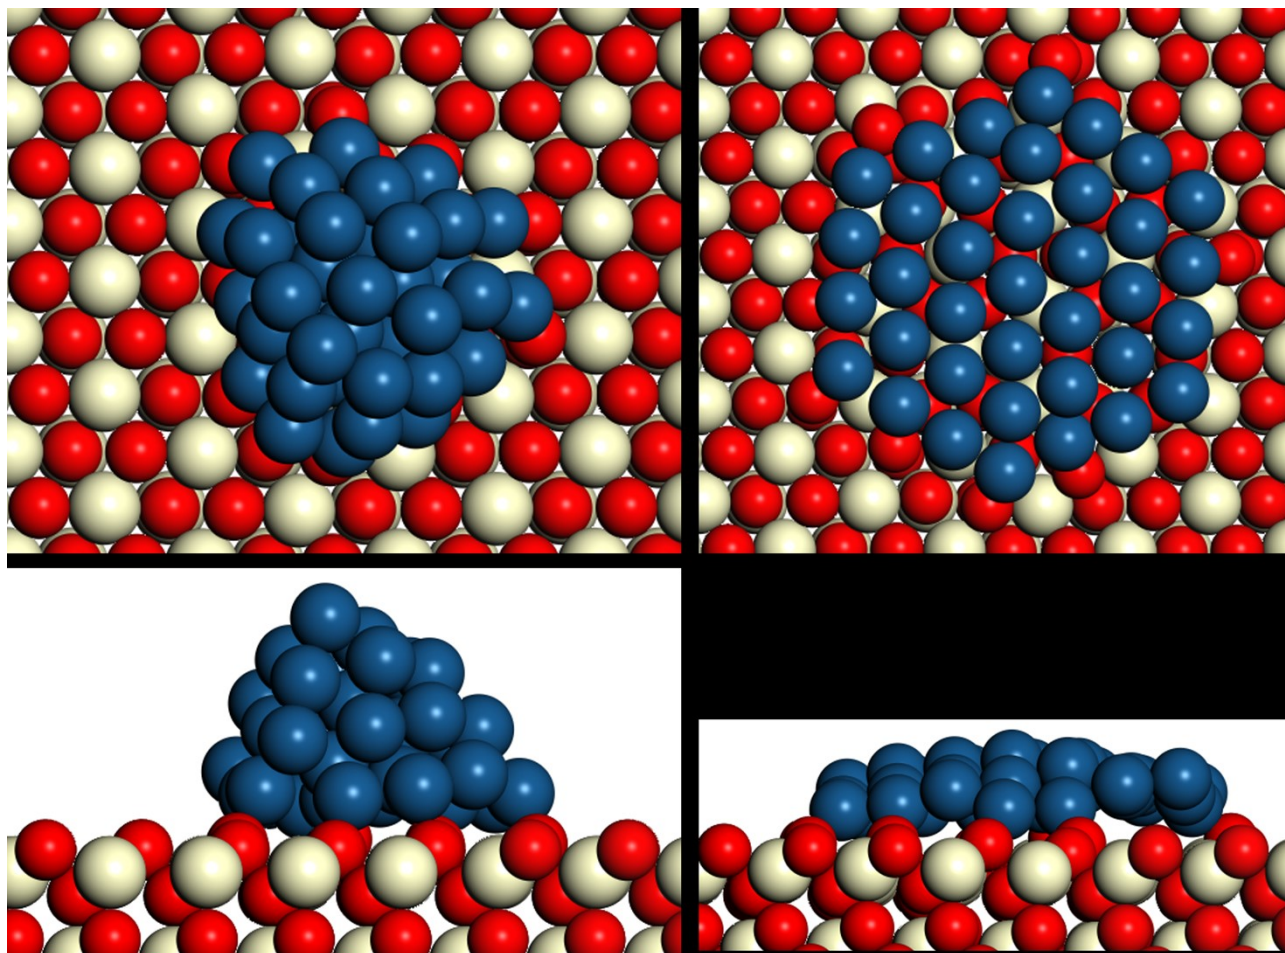

**Figure S3:** Pt<sub>37</sub> supported in a three- and one-dimensional fashion on CeO<sub>2</sub>(111). The 3D structure is preferred by 5.5 eV.

Color code: Blue – Pt, Eggshell – Ce, Red – O.



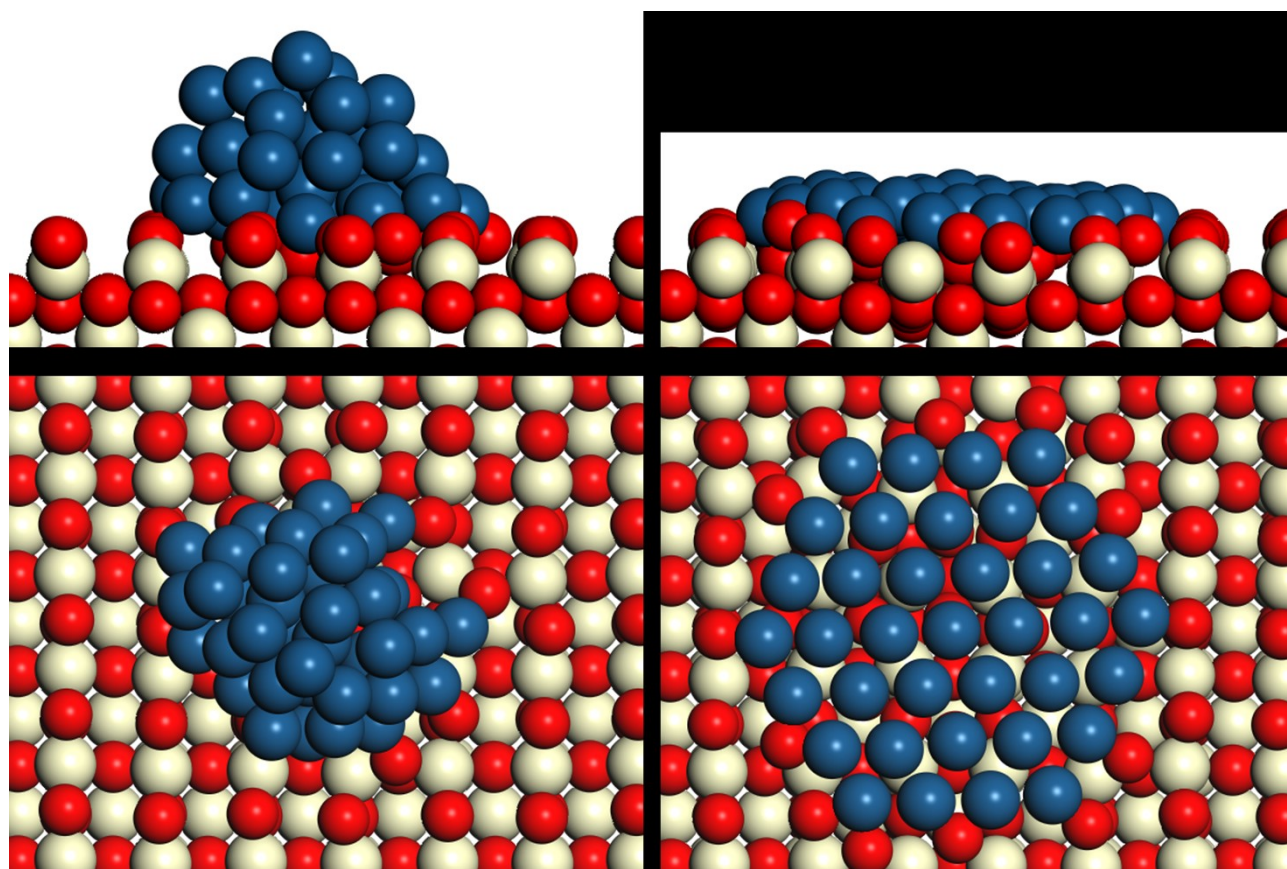

**Figure S4:** Pt<sub>37</sub> supported in a three- and one-dimensional fashion on CeO<sub>2</sub>(100). The 2D structure is preferred by 3.9 eV.

Color code: Blue – Pt, Eggshell – Ce, Red – O.

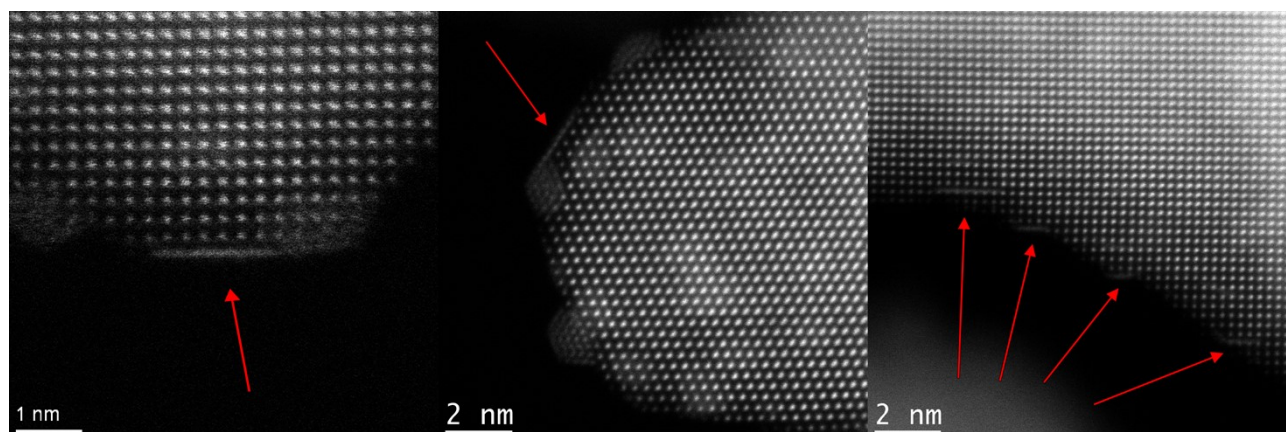

**Figure S5:** Examples of 2D Pt structures on CeO<sub>2</sub>(100). These Pt particles were not deposited by cluster beam deposition, but by regular magnetron sputtering and therefore have a random size.

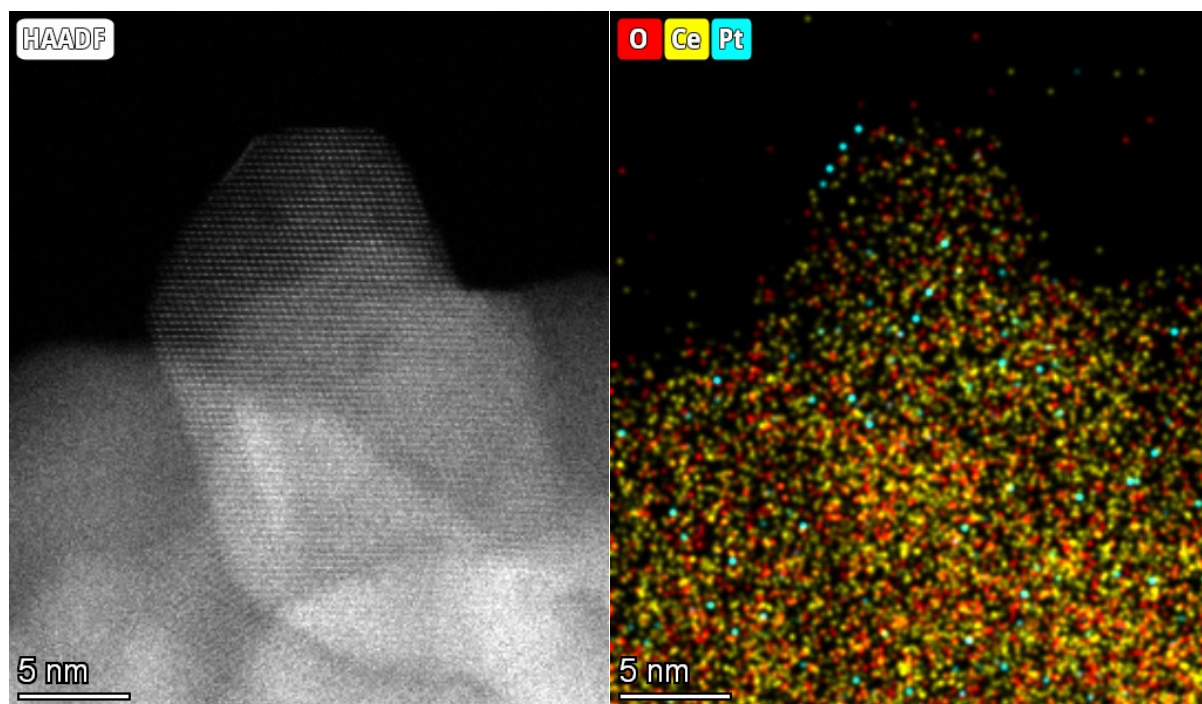

**Figure S6:** HAADF-STEM image and corresponding EDX map of the region in Fig. 1 of the main text, mirrored. There are a few Pt counts at the raft structure.

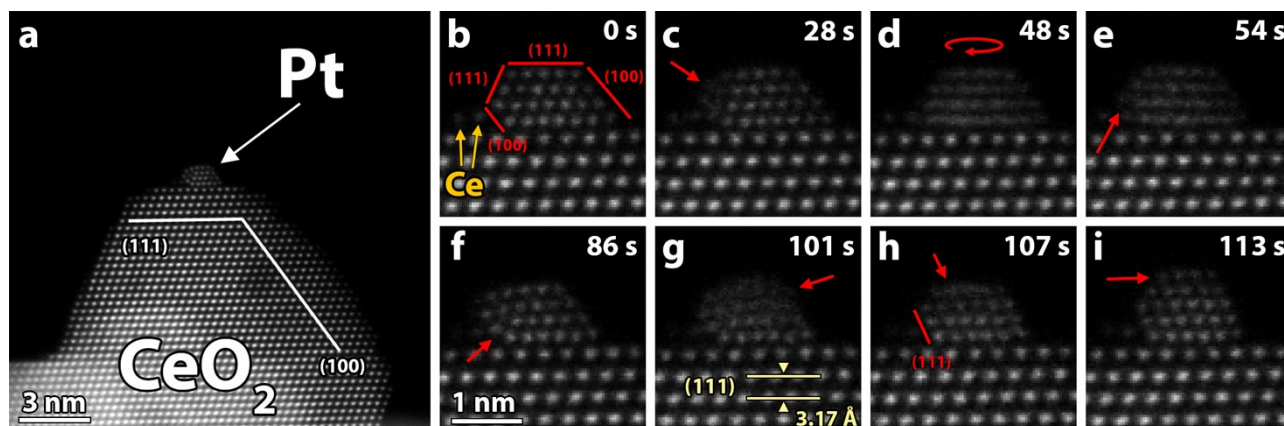

**Figure S7:** Grayscale version of Figure 1 in the main text.



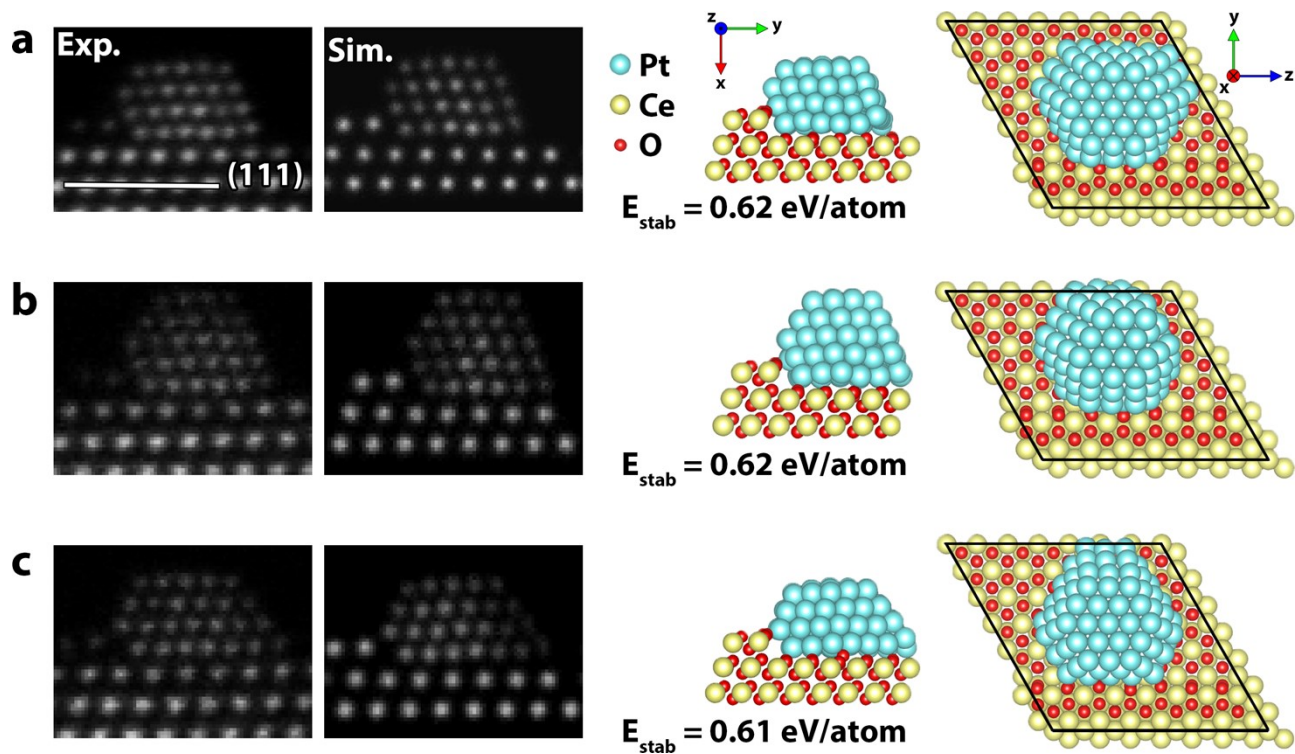

**Figure S8:** Grayscale version of Figure 2 in the main text.

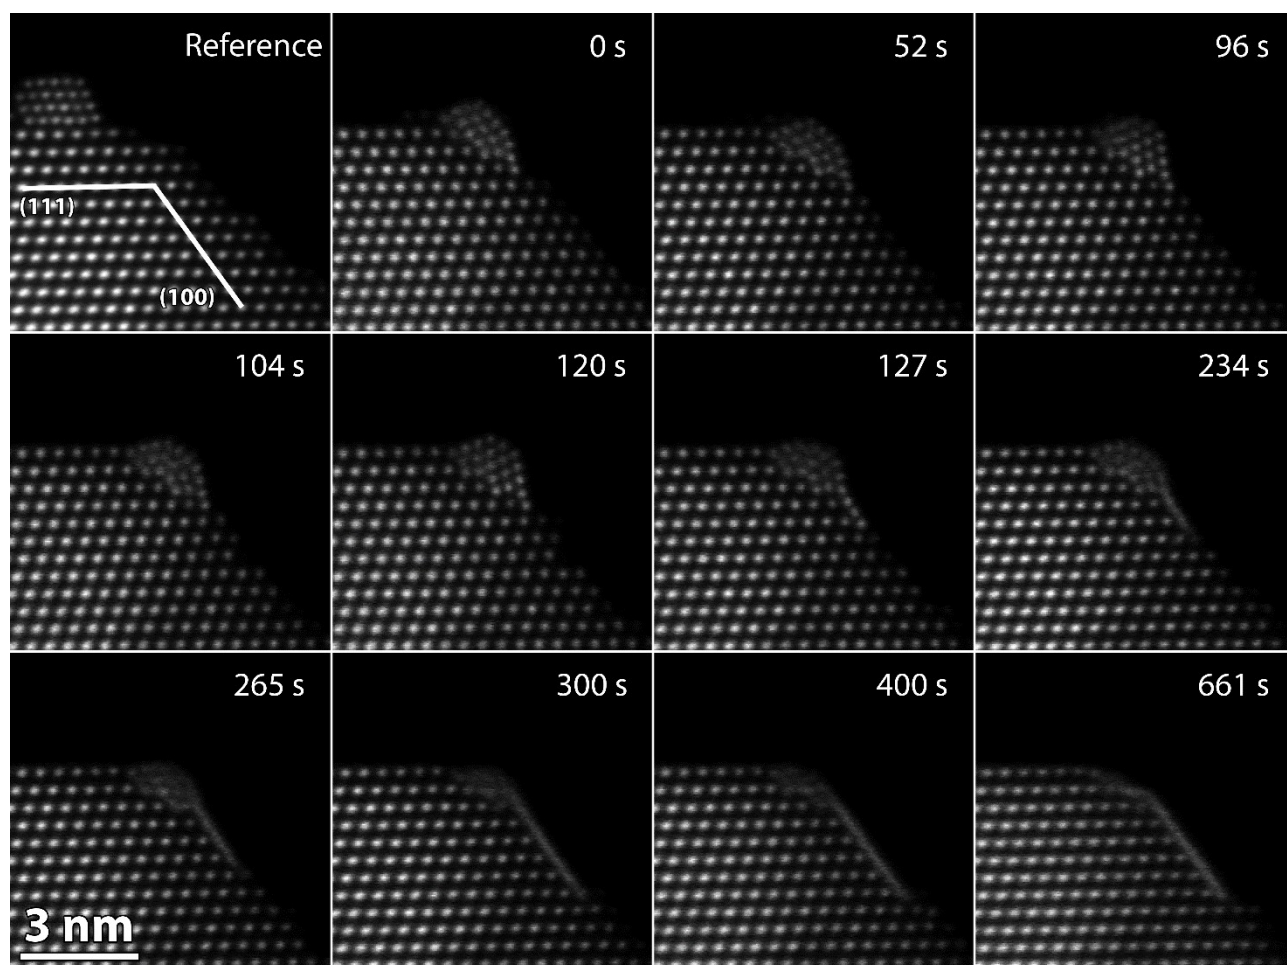

**Figure S9:** Grayscale version of Figure 3 in the main text.

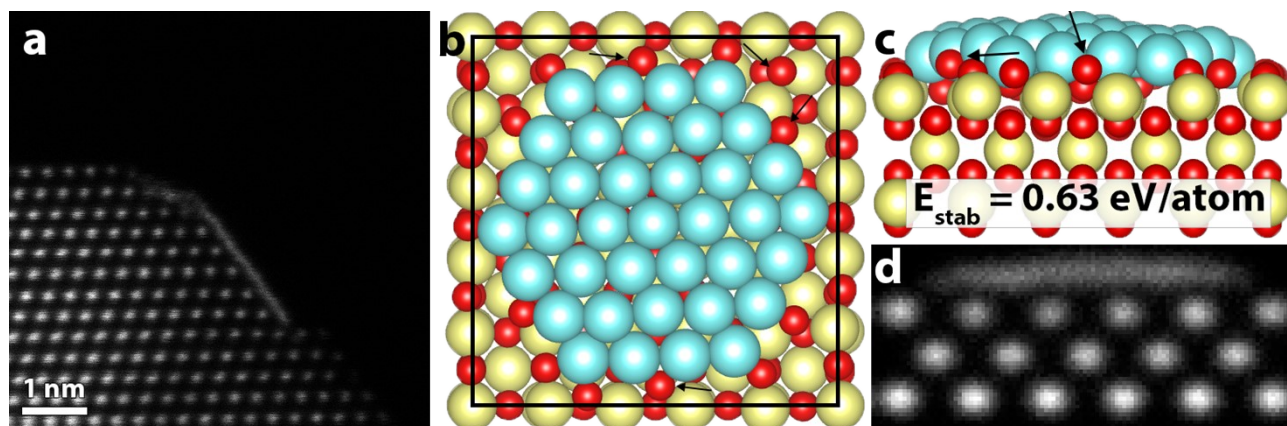

**Figure S10:** Grayscale version of Figure 4 in the main text.
